# Supplementary material for: Trends in prediabetes and diabetes prevalence and associated risk factors in Vietnamese adults
Source: PubMed Central journal article supplement (PMC7644943; doi:10.4178/epih.e2020029), 2020-05-11
Supplement: epih-42-e2020029-suppl1.pdf [file epih-42-e2020029-suppl1.pdf]

Supplementary Material 1. Age-standardized prevalence of diabetes among study participants<sup>1</sup> (*Based on FPG only*)

| Year                                               | 2011     | 2012    | 2013     | 2014     | 2015     | 2016     | 2017     | APC<br>% | P <sub>trend</sub> |
|----------------------------------------------------|----------|---------|----------|----------|----------|----------|----------|----------|--------------------|
| No. respondents                                    | 1530     | 2998    | 3982     | 994      | 1251     | 981      | 989      |          |                    |
| No. with diabetes                                  | 146      | 185     | 293      | 115      | 162      | 125      | 108      |          |                    |
| Crude prevalence                                   | 9.5±0.8  | 6.2±0.4 | 7.4±0.4  | 11.6±1.0 | 12.9±0.9 | 12.7±1.1 | 10.9±1.0 | 11.60    | 0.1                |
| Adj. prevalence                                    | 7.9±0.7  | 5.6±0.4 | 6.0±0.4  | 10.2±1.0 | 11.5±0.9 | 11.0±1.0 | 10.4±1.0 | 12.44    | 0.1                |
| Age group                                          |          |         |          |          |          |          |          |          |                    |
| 45 - 49                                            | 6.0±1.4  | 4.2±0.7 | 4.5±0.6  | 6.8±1.6  | 7.1±1.4  | 7.7±1.6  | 6.6±1.4  | 10.74    | 0.1                |
| 50 - 54                                            | 6.7±1.4  | 4.7±0.9 | 3.9±0.8  | 8.2±2.0  | 10.8±2.0 | 8.1±2.2  | 10.9±2.2 | 16.36    | <0.001             |
| 55 - 59                                            | 7.0±1.5  | 6.4±1.0 | 6.4±0.9  | 15.0±2.4 | 13.0±2.0 | 11.8±2.4 | 9.2±2.0  | 9.45     | 0.1                |
| 60 - 64                                            | 11.0±2.0 | 8.0±1.2 | 9.8±1.3  | 11.9±2.6 | 12.4±2.4 | 20.2±3.0 | 12.3±2.6 | 14.72    | 0.1                |
| 65 - 69                                            | 15.9±1.9 | 8.6±1.2 | 12.2±1.1 | 16.3±2.6 | 24.9±3   | 17.5±2.8 | 22.3±3.7 | 13.50    | 0.1                |
| Sex                                                |          |         |          |          |          |          |          |          |                    |
| Female                                             | 7.7±0.8  | 5.3±0.5 | 5.7±0.4  | 9.9±1.1  | 10.5±1.0 | 9.4±1.1  | 9.7±1.1  | 12.13    | 0.1                |
| Male                                               | 8.6±1.6  | 6.8±1.0 | 7.0±0.8  | 11.5±2.1 | 14.6±2.0 | 15.5±2.4 | 12.9±2.2 | 12.12    | 0.1                |
| Educational levels                                 |          |         |          |          |          |          |          |          |                    |
| Illiteracy to secondary school (grade 9 and below) | 8.3±1.0  | 5.9±0.5 | 7.5±0.6  | 10.3±1.4 | 11.8±1.2 | 12.1±1.4 | 10.9±1.3 | 12.25    | <0.001             |
| High school (grade 10-12)                          | 6.1±1.2  | 4.8±0.8 | 3.8±0.6  | 9.8±1.6  | 12.0±1.8 | 10.7±1.9 | 10.5±1.8 | 18.67    | 0.1                |
| College or more                                    | 6.7±2.0  | 4.9±1.2 | 4.1±0.9  | 10.5±2.3 | 10.2±2.5 | 6.2±2.3  | 8.1±2.8  | 11.22    | 0.3                |
| Region                                             |          |         |          |          |          |          |          |          |                    |
| Rural                                              | N/A      | 4.8±0.7 | 6.1±0.8  | N/A      | N/A      | 10.5±1.4 | 11.7±1.4 | N/A      | N/A                |
| Urban                                              | 7.9±0.7  | 6±0.5   | 6.0±0.4  | 10.2±1.0 | 11.5±0.9 | 11.8±1.5 | 9.2±1.3  | 11.72    | 0.3                |

<sup>1</sup> Data are percentage (±Standard Error). Direct age adjustment of the data was done for the Vietnamese population aged ≥45 years in the year 2009. APC: annual percent change. FPG: The fasting plasma glucose test
