# Supplementary material for: Trends in prediabetes and diabetes prevalence and associated risk factors in Vietnamese adults
Source: PubMed Central journal article supplement (PMC7644943; doi:10.4178/epih.e2020029), 2020-05-11
Supplement: epih-42-e2020029-suppl2.pdf [file epih-42-e2020029-suppl2.pdf]

Supplementary Material 2. Age-standardized prevalence of prediabetes among study participants<sup>1</sup> (*Based on FPG only*)

| Year<br>(N=12725)                                 | 2011     | 2012     | 2013     | 2014     | 2015     | 2016     | 2017     | APC<br>(%) | P <sub>trend</sub> |
|---------------------------------------------------|----------|----------|----------|----------|----------|----------|----------|------------|--------------------|
| No. respondents                                   | 1530     | 2998     | 3982     | 994      | 1251     | 981      | 989      |            |                    |
| No. with prediabetes                              | 469      | 632      | 1248     | 540      | 659      | 489      | 522      |            |                    |
| Crude prevalence overall                          | 34.7±1.2 | 24.1±0.8 | 34.4±0.8 | 56.3±1.6 | 54.8±1.4 | 53.0±1.6 | 53.1±1.6 | 13.04      | <0.001             |
| Adj. prevalence overall                           | 32.6±1.3 | 23.0±0.8 | 33.1±0.8 | 55.2±1.7 | 55.2±1.5 | 51.8±1.7 | 53.2±1.6 | 14.35      | <0.001             |
| Age group                                         |          |          |          |          |          |          |          |            |                    |
| 45 - 49                                           | 26.5±2.6 | 20.5±1.4 | 30.6±1.4 | 50.4±3.3 | 52.8±2.8 | 48.0±3.0 | 47.2±2.9 | 12.88      | <0.001             |
| 50 - 54                                           | 33.3±2.6 | 21.2±1.7 | 33.2±1.9 | 56.0±3.7 | 58.2±3.1 | 50.6±4.0 | 57.5±3.6 | 18.68      | <0.001             |
| 55 - 59                                           | 34.9±2.8 | 22.6±1.7 | 32.4±1.7 | 59.1±3.3 | 57.0±3.0 | 55.1±3.7 | 58.3±3.4 | 16.06      | <0.001             |
| 60 - 64                                           | 38.6±3.1 | 29.4±2.1 | 34.8±2.0 | 56.3±3.9 | 58.2±3.5 | 55.7±3.7 | 54.8±4.0 | 15.25      | <0.001             |
| 65 - 69                                           | 39.5±2.5 | 29.7±1.9 | 40.8±1.6 | 60.7±3.5 | 47.8±3.5 | 57.7±3.6 | 50.0±4.4 | 15.20      | <0.001             |
| Sex                                               |          |          |          |          |          |          |          |            |                    |
| Female                                            | 34.2±1.5 | 25.0±1.0 | 35.5±1.0 | 57.6±2.0 | 56.3±1.7 | 53.1±2.0 | 52.8±1.9 | 11.74      | <0.001             |
| Male                                              | 28.4±2.4 | 17.2±1.4 | 27.4±1.4 | 50.0±3.3 | 52.3±3.0 | 48.7±3.5 | 54.8±3.3 | 9.47       | 0.1                |
| Educational levels                                |          |          |          |          |          |          |          |            |                    |
| Illiteracy to secondary school(grade 9 and below) | 34.6±1.9 | 23.3±1.0 | 33.8±1.1 | 55.6±2.5 | 57.3±1.9 | 52.4±2.2 | 55.7±2.2 | 15.07      | <0.001             |
| High school (grade 10-12)                         | 30.6±2.2 | 22.4±1.6 | 33.4±1.5 | 54.9±2.9 | 51.9±2.8 | 50.6±3.3 | 49.5±2.9 | 13.13      | <0.001             |
| College or more                                   | 29.3±3.4 | 23.9±2.3 | 29.9±2.1 | 57.8±3.8 | 52.3±4.3 | 51.9±4.7 | 49.2±4.7 | 14.98      | 0.1                |
| Region                                            |          |          |          |          |          |          |          |            |                    |
| Rural                                             | N/A      | 20.8±1.3 | 37.4±1.7 | N/A      | N/A      | 51.5±2.4 | 57.7±2.3 | N/A        | N/A                |
| Urban                                             | 32.6±1.3 | 24.2±1.0 | 31.7±0.9 | 55.2±1.7 | 55.2±1.5 | 52.3±2.5 | 48.5±2.3 | 14.67      | <0.001             |

<sup>1</sup> Data are percentage (±Standard Error). Direct age adjustment of the data was done for the Vietnamese population aged ≥45 years in the year 2009. APC: annual percent change. FPG: The fasting plasma glucose test
