# Supplementary material for: Trends in prediabetes and diabetes prevalence and associated risk factors in Vietnamese adults
Source: PubMed Central journal article supplement (PMC7644943; doi:10.4178/epih.e2020029), 2020-05-11
Supplement: epih-42-e2020029-suppl3.pdf [file epih-42-e2020029-suppl3.pdf]

Supplementary Material 3. Binary logistic regression analysis: related factors of prediabetes and diabetes, compared to adults with normal glucose tolerance, 2011-2017<sup>1</sup>.

|                                                   | <b>Both</b> |           | <b>Women</b> |           | <b>Men</b> |           |
|---------------------------------------------------|-------------|-----------|--------------|-----------|------------|-----------|
|                                                   | aOR         | 95%CI     | aOR          | 95%CI     | aOR        | 95%CI     |
| Age group                                         |             |           |              |           |            |           |
| 45 - 49                                           | 1.00        |           | 1.00         |           | 1.00       |           |
| 50 - 54                                           | 1.08        | 0.94-1.24 | 1.10         | 0.93-1.30 | 1.03       | 0.80-1.32 |
| 55 - 59                                           | 1.13        | 0.99-1.29 | 1.17         | 1.00-1.38 | 1.06       | 0.84-1.34 |
| 60 - 64                                           | 1.37        | 1.19-1.58 | 1.60         | 1.35-1.90 | 1.01       | 0.79-1.29 |
| 65 - 69                                           | 1.49        | 1.30-1.70 | 1.61         | 1.37-1.89 | 1.26       | 1.00-1.58 |
| Gender                                            |             |           |              |           |            |           |
| Women                                             | 1.00        |           | -            | -         | -          | -         |
| Men                                               | 0.82        | 0.74-0.91 | -            | -         | -          | -         |
| Educational levels                                |             |           |              |           |            |           |
| Illiteracy to secondary school(grade 9 and below) | 1.00        |           | 1.00         |           | 1.00       |           |
| High school (grade 10-12)                         | 0.97        | 0.88-1.08 | 1.04         | 0.91-1.18 | 0.88       | 0.74-1.04 |
| College or more                                   | 1.01        | 0.87-1.16 | 1.02         | 0.85-1.24 | 0.99       | 0.79-1.22 |
| Region                                            |             |           |              |           |            |           |
| Rural                                             | 1.00        |           | 1.00         |           | 1.00       |           |
| Urban                                             | 1.09        | 0.99-1.21 | 1.11         | 0.98-1.25 | 1.07       | 0.90-1.28 |
| Obesity (BMI $\geq$ 25)                           |             |           |              |           |            |           |
| No                                                | 1.00        |           | 1.00         |           | 1.00       |           |
| Yes                                               | 1.48        | 1.33-1.65 | 1.40         | 1.23-1.59 | 1.74       | 1.42-2.14 |
| Waist-hip ratio                                   |             |           |              |           |            |           |
| Normal                                            | 1.00        |           | 1.00         |           | 1.00       |           |
| Large                                             | 1.23        | 1.08-1.39 | 1.09         | 0.88-1.34 | 1.36       | 1.15-1.60 |
| Hypertension                                      |             |           |              |           |            |           |
| No                                                | 1.00        |           | 1.00         |           | 1.00       |           |
| Yes                                               | 1.17        | 1.10-1.24 | 1.16         | 1.08-1.25 | 1.16       | 1.05-1.29 |
| Abdominal Obese                                   |             |           |              |           |            |           |
| No                                                | 1.00        |           | 1.00         |           | 1.00       |           |
| Yes                                               | 1.17        | 1.06-1.30 | 1.26         | 1.12-1.42 | 0.93       | 0.76-1.15 |
| Dyslipidemia                                      |             |           |              |           |            |           |
| No                                                | 1.00        |           | 1.00         |           | 1.00       |           |
| Yes                                               | 1.11        | 0.98-1.26 | 1.18         | 1.01-1.37 | 0.96       | 0.76-1.20 |

<sup>1</sup> Diabetes and prediabetes was combined for the outcome. aOR, adjusted odds ratio. Multivariate logistic analysis included all variables in the model.
